# Supplementary material for: Brief Report: A Gene Enrichment Approach Applied to Sleep and Autism
Source: Springer Nature journal article supplement (doi:10.1007/s10803-019-03921-5), 2019-02-21
Supplement: MOESM1 [file 16499086]

Supplemental Table 1. Genes linked to sleep phenotypes with at least two pieces of empirical evidence and/or one GWAS study.

| Gene Symbol | Official Gene Name | Sleep Phenotype(s) | Example References |
| --- | --- | --- | --- |
| SCN8A | *Sodium voltage-gated channel alpha subunit 8* | Morning vs. evening chronotype; REM sleep | [1, 2] |
| DSCAM | *DS cell adhesion molecule* | Narcolepsy; drosophila sleep | [3, 4] |
| EPB41 | *Erythrocyte membrane protein band 4.1* | Bedtime; sleep timing | [5, 6] |
| NCOA7 | *Nuclear receptor coactivator 7* | Sleep latency; Sleep duration; sleep duration | [5, 7, 8] |
| DLGAP1 | *DLG associated protein 1* | Sleep apnea; sleep duration | [9, 10] |
| TRPA1 | *Transient receptor potential cation channel subfamily A member 1* | Circadian Rhythm; sleep onset, elevated temperatures; Circadian clock | [11-13] |
| IER3 | *Immediate early response 3* | Sleep duration; sleep deprivation | [14, 15] |
| NFATC | *Nuclear factor of activated T cells 2* | Insomnia; narcolepsy | [16, 17] |
| ATP9A | *ATPase phospholipid transporting 9A (putative)* | Insomnia; narcolepsy | [16, 18] |
| UFL1 | *UFM1 specific ligase 1* | Sleep efficiency | [7] |
| DMRT1 | *Doublesex and mab-3 related transcription factor 1* | Sleep latency | [7] |
| FABP7 | *Fatty acid binding protein 7* | Fragmented Sleep; sleep homeostasis | [19, 20] |
| MEIS1 | *Meis homeobox 1* | Sleep latency; insomnia | [21, 22] |
| TMEM132B | *Transmembrane protein 132B* | Insomnia symptoms; excessive daytime sleepiness | [23-25] |
| TMEM132E | *Transmembrane protein 132E* | Insomnia symptoms; Sleep duration | [16, 23] |
| CHST15 | *Carbohydrate sulfotransferase 15* | Daytime sleep phenotypes (e.g., daytime resting) | [7] |
| CPXM2 | *Carboxypeptidase X, M14 family member 2* | Sleep timing, quantity, and quality | [26] |
| OPHN1 | *Oligophrenin 1* | Excessive daytime sleepiness | [23] |
| ADCK5 | *Aarf domain containing kinase 5* | Insomnia | [23] |
| ZMYM4 | *Zinc finger MYM-type containing 4* | Sleep duration | [26] |
| CSNK2A1 | *Casein kinase 2 alpha 1* | Sleep latency | [26-28] |
| PIN1 | *Peptidylprolyl cis/trans isomerase, NIMA-interacting 1* | Sleep duration | [14] |
| ADCY1 | *Adenylate cyclase 1* | Sleep efficiency | [26] |
| SNX7 | *Sorting nexin 7* | Sleep offset | [26] |
| PRIMA1 | *Proline rich membrane anchor 1* | Sleep duration | [23, 29] |
| DPYSL3 | *Dihydropyrimidinase like 3* | Excessive daytime sleepiness | [23] |
| CPEB1 | *Cytoplasmic polyadenylation element binding protein 1* | Excessive daytime sleepiness | [23] |
| SPTLC3 | *Serine palmitoyltransferase long chain base subunit 3* | Daytime sleep phenotypes | [26] |
| METTL24 | *Methyltransferase like 24* | Daytime sleep phenotypes: daytime resting duration | [26] |
| TANC1 | *Tetratricopeptide repeat, ankyrin repeat and coiled-coil containing 1* | Daytime sleep phenotypes; daytime resting duration | [26] |
| CSMD1 | *CUB and Sushi multiple domains 1* | Night sleep phenotypes | [26] |
| ARHGEF10L | *Rho guanine nucleotide exchange factor 10 like* | Insomnia | [23] |
| ACBD4 | *Acyl-coa binding domain containing 4* | Insomnia | [23] |
| FOXP2 | *Forkhead box P2* | Sleep duration | [23] |
| NR3C1 | *Nuclear receptor subfamily 3 group C member 1* | Daytime sleep phenotypes: mid-sleep time, sleep onset. | [26] |
| PCDH15 | *Protocadherin related 15* | Sleep duration | [23] |
| CCT6B | *Chaperonin containing TCP1 subunit 6B* | Sleep onset | [26] |
| TMEM144 | *Transmembrane protein 144* | Excessive daytime sleepiness | [23] |
| DRD2 | *Dopamine receptor D2* | Sleep duration | [23, 30] |
| HNRNPH1 | *Heterogeneous nuclear ribonucleoprotein H* | Daytime sleep phenotypes: daytime napping | [26] |
| SLC9A9 | *Solute carrier family 9 member A9* | Night sleep phenotypes: sleep duration | [26] |
| SLC26A7 | *Solute carrier family 26 member 7* | Night Sleep phenotypes: sleep latency | [26] |
| MMP20 | *Matrix metallopeptidase 20* | Night sleep phenotypes: sleep offset | [26] |
| DEFA6 | *Defensin alpha 6* | Night sleep phenotypes: sleep onset irregularity | [26] |
| LRRK2 | *Leucine rich repeat kinase 2* | Rapid eye movement sleep behavior | [31, 32] |
| PLPPR5 | *Phospholipid phosphatase related 5* | Night sleep phenotypes: sleep offset | [26] |
| MYO9B | *Myosin IXB* | Night sleep phenotypes: sleep onset irregularity | [26] |
| FOXO6 | *Forkhead box O6* | Night sleep phenotypes: wake after sleep onset, weekdays | [26] |
| LHFPL4 | *LHFPL tetraspan subfamily member 4* | Daytime sleep phenotypes: daytime napping | [26] |
| TMEM170B | *Transmembrane protein 170B* | Daytime sleep phenotypes: daytime resting | [26] |
| SGCD | *Sarcoglycan delta* | Daytime sleep phenotypes: daytime resting duration, weekdays | [26] |
| HIVEP2 | *Human immunodeficiency virus type I enhancer binding protein 2* | Daytime sleep phenotypes: daytime resting duration | [26] |
| SLC35F4 | *Solute carrier family 35 member F4* | Night sleep phenotypes: mid-sleep times | [26] |
| TMEM45B | *Solute carrier family 35 member F4* | Night sleep phenotypes: resting duration | [26] |
| HLCS | *Holocarboxylase synthetase* | Resting duration | [26] |
| FUT9 | *Fucosyltransferase 9* | Sleep efficiency | [26] |
| COL4A1 | *Collagen type IV alpha 1 chain* | Sleep duration, sleep onset, sleep duration | [26] |
| GLYR1 | *Glyoxylate reductase 1 homolog* | Sleep onset irregularity | [26] |
| SASH1 | *SAM and SH3 domain containing 1* | Wake after sleep onset | [26] |
| FXN | *Frataxin* | Wake after sleep onset | [26] |
| SLC2A13 | *Solute carrier family 2 member 13* | Daytime napping duration; insomnia | [21, 26] |
| CEP152 | *Centrosomal protein 152* | Insomnia | [21, 33] |
| ERC2 | *ELKS/RAB6-interacting/CAST family member 2* | Morning vs. evening chronotype; resting duration at night; daytime napping | [25, 26, 34] |
| KRT18P51 | *KRT18P51 keratin 18 pseudogene 51* | Daytime napping; daytime resting | [26] |
| SMOC1 | *SPARC related modular calcium binding 1* | Daytime resting duration; sleep | [26, 35] |
| SEC16B | *SEC16 homolog B, endoplasmic reticulum export factor* | Night sleep phenotypes | [26] |
| RCC1 | *Regulator of chromosome condensation 1* | Night sleep phenotypes | [26] |
| LYZL4 | *Lysozyme like 4* | Night sleep phenotypes | [26] |
| CLOCK | *Clock circadian regulator* | Nighttime sleep; circadian rhythm | [36, 37] |
| PER1 | *Period circadian regulator 1* | Fragmented sleep; sleep disruption | [38, 39] |
| PER3 | *Period circadian regulator 3* | Sleep homeostasis; sleep structure; sleep homeostasis; wakefulness | [40, 41] |
| PER2 | *Period circadian regulator 2* | Sleep Phase Disorder; Familial Advanced Sleep Phase Syndrome | [42, 43] |
| CRY1 | *Cryptochrome circadian regulator 1* | Sleep Phase Disorder; sleep rhythmicity | [42, 44] |
| CRY2 | *Cryptochrome circadian regulator 2* | Sleep Phase Disorder | [42, 45] |
| BMAL1 | *Aryl hydrocarbon receptor nuclear translocator like* | Sleep deprivation; Circadian rhythm abnormalities | [46, 47] |
| NPAS2 | *Neuronal PAS domain protein 2* | Circadian rhythm, sleep onset time | [48, 49] |
| TIMELESS | *Timeless circadian regulator* | Circadian rhythm; chronotype; sleep quality | [50, 51] |
| REV-ERBα | *Nuclear receptor subfamily 1 group D member 1* | Circadian rhythm | [52, 53] |
| GHRL | *Ghrelin and obestatin prepropeptide* | Circadian rhythm | [37, 54, 55] |
| IL6 | *Interleukin 6* | Sleep apnea | [56, 57] |
| CACNA1C | *Calcium voltage-gated channel subunit alpha1 C* | Sleep latency; REM Sleep | [58, 59] |
| AANAT | *Aralkylamine N-acetyltransferase* | Circadian Rhythm / sleep wake cycle; Delayed Sleep Phase Syndrome | [60, 61] |
| CSNK1D | *Casein kinase 1 delta* | Advanced sleep phase syndrome | [62, 63] |
| HCRTR2 | *Hypocretin receptor 2* | Excessive daytime sleepiness, Sleep control | [23, 64] |
| EYA1 | *EYA transcriptional coactivator and phosphatase 1* | Sleep-related phenotypes | [5] |
| SATB2 | *SATB homeobox 2* | Insomnia | [21] |
| RBFOX1 | *RNA binding fox-1 homolog 1* | Sleep timing | [21] |
| OPCML | *Opioid binding protein/cell adhesion molecule like* | Sleep-related phenotypes: bedtime | [5] |
| ADORA2A | *Adenosine A2a receptor* | insomnia; sleep restriction; Wake after sleep onset | [65-67] |
| FGF12 | *Fibroblast growth factor 12 [Homo sapiens* | Sleep quality | [21] |
| TLN2 | *Talin 2* | Sleep depth | [21] |
| EBF3 | *Early B cell factor 3* | Sleep timing | [21] |
| MYRIP | *Myosin VIIA and Rab interacting protein* | Sleep duration | [5] |
| ADAMTS14 | *ADAM metallopeptidase with thrombospondin type 1 motif 14* | Sleep duration | [21] |
| TUSC1 | *Tumor suppressor candidate 1* | Sleep quality | [21] |
| NAALADL2 | *N-acetylated alpha-linked acidic dipeptidase like 2* | Sleep duration | [21] |
| CPQ | *Carboxypeptidase Q* | Sleep duration | [21] |
| FBXO15 | *F-box protein 15* | Sleep duration | [65] |
| PLLP | *Plasmolipin* | Sleep duration | [65] |
| L3MBTL4 | *L3MBTL4, histone methyl-lysine binding protein* | Sleep timing | [65] |
| HTR2A | *5-hydroxytryptamine receptor 2A* | Obstructive sleep apnea | [68, 69] |
| TNF | *Tumor necrosis factor* | Obstructive sleep apnea | [70, 71] |
| APOE | *Apolipoprotein E* | Obstructive sleep apnea; sleep quality; sleep fragmentation; sleep architecture | [72-75] |
| PTGDS | *Prostaglandin D2 synthase* | REM sleep | [76-78] |
| SLC6A4 | *Solute carrier family 6 member 4* | Sleep bruxism; sleep duration | [79-81] |
| COMT | *Catechol-O-methyltransferase* | Sleep-wake cycle; sleep continuity; sleep loss | [82-84] |
| ACE | *Angiotensin I converting enzyme* | Risk for developing obstructive sleep apnea/susceptibility toward obstructive sleep apnea | [85-87] |
| BDNF | *Brain derived neurotrophic factor* | REM sleep; slow wave activity; Sleep EEG parameters; cognitive performance after sleep deprivation | [88-90] |
| ADIPOQ | *Adiponectin, C1Q and collagen domain containing* | Obstructive sleep apnea | [91, 92] |
| SLC6A3 | *Solute carrier family 6 member 3* | Sleep-wake cycle; sleep architecture | [82, 93, 94] |
| BHLHE41 | *Basic helix-loop-helix family member e41* | Regulating sleep wake duration/sleep length | [95-97] |
| CACNA1I | *Calcium voltage-gated channel subunit alpha1* | Sleep onset latency; narcolepsy | [58, 98] |
| HLA-DQB1 | *Major histocompatibility complex, class II, DQ beta 1* | Sleep physiology in obstructive sleep apnea syndrome patients; NREM parasomnias | [99, 100] |
| ARNTL | *Aryl hydrocarbon receptor nuclear translocator like* | sleep chronotype; total sleep duration, sleep loss, sleep regulation | [1, 101] |
| EDN1 | *Endothelin 1* | Obstructive sleep apnea | [102, 103] |
| PRKN | *Parkin RBR E3 ubiquitin protein ligase* | Sleep disorders; REM Behavior Disorder | [104, 105] |
| OPN4 | *Opsin 4* | Sleep/wake timing | [106, 107] |
| PSEN1 | *Presenilin 1* | Onset of daytime wakefulness; peak wakefulness; wakefulness/REM Sleep | [108, 109] |
| AR | *Androgen receptor* | Sleep duration | [25, 110] |
| IL1B | *Interleukin 1 beta* | Sleep disturbance; obstructive sleep apnea syndrome | [57, 111] |
| MECP2 | *Methyl-cpg binding protein 2* | Night-time laughter, night-time seizures, daytime napping; phase-specific sleep loss, sleep fragmentation | [112, 113] |
| LEPR | *Leptin receptor* | Obstructive sleep apnea syndrome risk factor; apnoea-hypopnoea index | [114-116] |
| CSNK1E | *Casein kinase 1 epsilon* | Delayed Sleep Phase Syndrome (DSPS); mutation is a regulator for clock genes | [117, 118] |
| ASMT | *Acetylserotonin O-methyltransferase* | Sleep onset delay; circadian rhythm; sleep duration; active sleep periods; intraday stability | [119, 120] |
| PTGS2 | *Prostaglandin-endoperoxide synthase 2* | Obstructive sleep apnea-hypopnea syndrome | [121, 122] |
| MAOA | *Monoamine oxidase A* | Sleep quality; sleep latency; sleep efficiency; insomnia; sleep disturbance | [123-125] |
| IRS1 | *Insulin receptor substrate 1* | Obstructive sleep apnea-hypopnea syndrome risk | [126, 127] |
| P2RX7 | *Purinergic receptor P2X 7* | Rapid cycling in Sleep/wake cycles | [128, 129] |
| SCN1A | *Sodium voltage-gated channel alpha subunit 1* | Sleep disturbances; sleep macroarchitecture; sleep regulation | [130, 131] |
| DISC1 | *DISC1 scaffold protein* | Sleep homeostasis | [132, 133] |
| ADRB1 | *Adrenoceptor beta 1* | Obstructive sleep apnea-hypopnea syndrome & Obstructive sleep apnea | [134, 135] |
| CYP2B6 | *Cytochrome P450 family 2 subfamily B member 6* | Sleep quality | [136, 137] |
| CYBA | *Cytochrome b-245 alpha chain* | Obstructive sleep apnea-hypopnea syndrome severity | [138, 139] |
| HTR2C | *5-hydroxytryptamine receptor 2C* | Obstructive sleep apnea-hypopnea syndrome; slow wave sleep | [140-142] |
| UBE3A | *Ubiquitin protein ligase E3A* | Sleep duration, sleep onset latency; sleep onset; sleep drive | [143-145] |
| GABRA1 | *Gamma-aminobutyric acid type A receptor alpha1 subunit* | Zolpidem-induced complex sleep behaviors (csbs); Sleep induction time | [146, 147] |
| LBP | *Lipopolysaccharide binding protein* | Daytime sleepiness | [148] |
| NPSR1 | *Neuropeptide S receptor 1* | Sleep and rest duration; unusual bedtime | [149, 150] |
| CDKL5 | *Cyclin dependent kinase like 5* | Sleep onset; sleep maintenance; daytime somnolence; sleep breathing disorders; sleep apneas | [151, 152] |
| GRIA3 | *Glutamate ionotropic receptor AMPA type subunit 3* | Sleep duration; fatigue; early morning awakening | [129, 153] |
| PROKR2 | *Prokineticin receptor 2* | Sleep disorders | [154, 155] |
| PROK2 | *Prokineticin 2* | Circadian timing transmission | [5, 54, 156] |
| RGS16 | *Regulator of G protein signaling 16* | Circadian rhythm; chronotype; sleep traits | [1, 25, 34, 148] |
| AK5 | *Adenylate kinase 5* | Circadian rhythm; chronotype | [1, 25, 34] |
| APH1A | *Aph-1 homolog A, gamma-secretase subunit* | Chronotype | [1, 25, 34] |
| HTR6 | *5-hydroxytryptamine receptor 6* | Chronotype | [1, 25, 34, 148, 157] |
| EXD3 | *Exonuclease 3'-5' domain containing 3* | Circadian rhythm, chronotype | [25, 148] |
| ADA | *Adenosine deaminase* | Circadian regulation of sleep; REM sleep; sleepiness, fatigue, sleep pressure | [158-160] |
| FKBP1B | *FK506 binding protein 1B* | Chronotype | [25] |
| SGSM3 | *Small G protein signaling modulator 3* | Chronotype | [25] |
| NOS2 | *Nitric oxide synthase 2* | Sleep stages, REM Sleep in Parkinson patients; mRNA expression in Alzheimer's patients | [161, 162] |
| ADK | *Adenosine kinase* | REM; Major depression and insomnia | [163, 164] |
| TGFB1 | *Transforming growth factor beta 1* | Network for Sleep/Stress/HD & Expression for OSA | [165, 166] |
| ADRB2 | *Adrenoceptor beta 2* | Non-dipping nocturnal blood pressure (10% dip in sleep BP compared with wake BP) | [167-170] |

*Note.* Inclusion in the sleep gene set required a minimum of two peer-reviewed empirical findings (per gene) indicating the association of structural variations in that gene with sleep phenotypes (rather than the sleep phenotype influencing gene expression), or at least one peer-reviewed GWAS finding. Minimum statistical thresholds were: *p* < .05 for candidate gene studies and genome-wide *p* < .05e-8 for GWAS studies. Structural variations could include copy number variants, chromosomal re-arrangements, insertions, deletions, and single nucleotide polymorphisms (SNPs). However, most were SNPs.

References

1. Hu, Y., et al., *GWAS of 89,283 individuals identifies genetic variants associated with self-reporting of being a morning person.* Nat Commun, 2016. 7: p. 10448.

2. Papale, L.A., et al., *Dysfunction of the Scn8a voltage-gated sodium channel alters sleep architecture, reduces diurnal corticosterone levels, and enhances spatial memory.* J Biol Chem, 2010. 285(22): p. 16553-61.

3. Harbison, S.T., L.J. McCoy, and T.F. Mackay, *Genome-wide association study of sleep in Drosophila melanogaster.* Bmc Genomics, 2013. 14(1): p. 281.

4. Tafti, M., *Genetic aspects of normal and disturbed sleep.* Sleep medicine, 2009. 10: p. S17-S21.

5. Gottlieb, D.J., G.T. O'Connor, and J.B. Wilk, *Genome-wide association of sleep and circadian phenotypes.* BMC Med Genet, 2007. 8 Suppl 1: p. S9.

6. Parsons, M.J., *On the genetics of sleep disorders: genome-wide association studies and beyond.* Adv Genomics Genet, 2015. 5: p. 293-303.

7. Spada, J., et al., *Genome‐wide association analysis of actigraphic sleep phenotypes in the LIFE Adult Study.* Journal of sleep research, 2016. 25(6): p. 690-701.

8. Jumbo-Lucioni, P., et al., *Nuclear genomic control of naturally occurring variation in mitochondrial function in Drosophila melanogaster.* BMC Genomics, 2012. 13: p. 659.

9. Lee, D.-Y., *Nonlinear functional regression model for sequencing-based association and gene-gene interaction analysis of physiological traits and their applications to sleep apnea*. 2015, The University of Texas School of Public Health.

10. Vaughn, C.B., *The genetics of sleep behavior and the association with breast cancer risk and aggressiveness*. 2016, State University of New York at Buffalo.

11. Roessingh, S. and R. Stanewsky, *The Drosophila TRPA1 Channel and Neuronal Circuits Controlling Rhythmic Behaviours and Sleep in Response to Environmental Temperature.* International Journal of Molecular Sciences, 2017. 18(10): p. 2028.

12. Lamaze, A., et al., *Regulation of sleep plasticity by a thermo-sensitive circuit in Drosophila.* Sci Rep, 2017. 7: p. 40304.

13. Cavanaugh, D.J., et al., *The Drosophila Circadian Clock Gates Sleep through Time-of-Day Dependent Modulation of Sleep-Promoting Neurons.* Sleep, 2016. 39(2): p. 345-56.

14. Gottlieb, D.J., et al., *Novel loci associated with usual sleep duration: the CHARGE Consortium Genome-Wide Association Study.* Mol Psychiatry, 2015. 20(10): p. 1232-9.

15. Irwin, M.R., et al., *Sleep deprivation and activation of morning levels of cellular and genomic markers of inflammation.* Archives of internal medicine, 2006. 166(16): p. 1756-1762.

16. Scheinfeldt, L.B., et al., *Using the Coriell Personalized Medicine Collaborative Data to conduct a genome-wide association study of sleep duration.* Am J Med Genet B Neuropsychiatr Genet, 2015. 168(8): p. 697-705.

17. Livingston, W.S., et al., *Improved sleep in military personnel is associated with changes in the expression of inflammatory genes and improvement in depression symptoms.* Frontiers in psychiatry, 2015. 6.

18. Pandi-Perumal, S., et al., *16 Chronopharmacology: principles and applications in sleep medicine.* Sleep Disorders: Diagnosis and Therapeutics, 2008: p. 153.

19. Gerstner, J.R., et al., *Normal sleep requires the astrocyte brain-type fatty acid binding protein FABP7.* Science Advances, 2017. 3(4): p. e1602663.

20. Mang, G.M., et al., *Altered Sleep Homeostasis in Rev-erb α Knockout Mice.* Sleep, 2016. 39(3): p. 589-601.

21. Byrne, E.M., et al., *A genome-wide association study of sleep habits and insomnia.* Am J Med Genet B Neuropsychiatr Genet, 2013. 162B(5): p. 439-51.

22. Hammerschlag, A.R., et al., *Genome-wide association analysis of insomnia complaints identifies risk genes and genetic overlap with psychiatric and metabolic traits.* Nature Genetics, 2017: p. ng. 3888.

23. Lane, J.M., et al., *Genome-wide association analyses of sleep disturbance traits identify new loci and highlight shared genetics with neuropsychiatric and metabolic traits.* Nat Genet, 2017. 49(2): p. 274-281.

24. Marinelli, M., et al., *Heritability and Genome-Wide Association Analyses of Sleep Duration in Children: The EAGLE Consortium.* Sleep, 2016. 39(10): p. 1859-1869.

25. Jones, S.E., et al., *Genome-Wide Association Analyses in 128,266 Individuals Identifies New Morningness and Sleep Duration Loci.* PLoS Genet, 2016. 12(8): p. e1006125.

26. Spada, J., et al., *Genome-wide association analysis of actigraphic sleep phenotypes in the LIFE Adult Study.* J Sleep Res, 2016. 25(6): p. 690-701.

27. Nilsson, E.K., et al., *Epigenomics of Total Acute Sleep Deprivation in Relation to Genome-Wide DNA Methylation Profiles and RNA Expression.* OMICS, 2016. 20(6): p. 334-42.

28. Conn, K.K., *Increased inflammatory gene expression in masseter muscle of an orthognathic surgery subject with obstructive sleep apnea*. 2014: Temple University.

29. Byrne, E.M., et al., *A genome-wide association study of caffeine-related sleep disturbance: confirmation of a role for a common variant in the adenosine receptor.* Sleep, 2012. 35(7): p. 967-975.

30. Cade, B.E., et al., *Common variants in DRD2 are associated with sleep duration: the CARe consortium.* Human molecular genetics, 2015. 25(1): p. 167-179.

31. Ehrminger, M., et al., *Sleep aspects on video‐polysomnography in LRRK2 mutation carriers.* Movement Disorders, 2015. 30(13): p. 1839-1843.

32. Saunders‐Pullman, R., et al., *REM sleep behavior disorder, as assessed by questionnaire, in G2019S LRRK2 mutation PD and carriers.* Movement Disorders, 2015. 30(13): p. 1834-1839.

33. Comuzzie, A.G., et al., *Novel genetic loci identified for the pathophysiology of childhood obesity in the Hispanic population.* PLoS One, 2012. 7(12): p. e51954.

34. Lane, J.M., et al., *Genome-wide association analysis identifies novel loci for chronotype in 100,420 individuals from the UK Biobank.* Nat Commun, 2016. 7: p. 10889.

35. Jones, S., et al., *Molecular correlates of sleep and wakefulness in the brain of the white‐crowned sparrow.* Journal of neurochemistry, 2008. 105(1): p. 46-62.

36. Stankiewicz, A.J., et al., *Impaired Sleep, Circadian Rhythms and Neurogenesis in Diet-Induced Premature Aging.* Int J Mol Sci, 2017. 18(11).

37. Krishnan, M., et al., *Gene-by-environment interactions of the CLOCK, PEMT, and GHRELIN loci with average sleep duration in relation to obesity traits using a cohort of 643 New Zealand European children.* Sleep Med, 2017. 37: p. 19-26.

38. Hsu, Y.A., et al., *The Dorsal Medial Habenula Minimally Impacts Circadian Regulation of Locomotor Activity and Sleep.* J Biol Rhythms, 2017. 32(5): p. 444-455.

39. Husse, J., et al., *Circadian clock genes Per1 and Per2 regulate the response of metabolism-associated transcripts to sleep disruption.* PLoS One, 2012. 7(12): p. e52983.

40. Hasan, S., et al., *A human sleep homeostasis phenotype in mice expressing a primate-specific PER3 variable-number tandem-repeat coding-region polymorphism.* The FASEB Journal, 2014. 28(6): p. 2441-2454.

41. Viola, A.U., et al., *PER3 polymorphism predicts sleep structure and waking performance.* Current Biology, 2007. 17(7): p. 613-618.

42. von Schantz, M., *Natural variation in human clocks.* Advances in Genetics, 2017.

43. Vanselow, K., et al., *Differential effects of PER2 phosphorylation: molecular basis for the human familial advanced sleep phase syndrome (FASPS).* Genes & development, 2006. 20(19): p. 2660-2672.

44. Ackermann, K., et al., *Effect of sleep deprivation on rhythms of clock gene expression and melatonin in humans.* Chronobiology international, 2013. 30(7): p. 901-909.

45. Hirano, A., et al., *A Cryptochrome 2 mutation yields advanced sleep phase in humans.* Elife, 2016. 5.

46. Marti, A.R., et al., *No Escaping the Rat Race: Simulated Night Shift Work Alters the Time-of-Day Variation in BMAL1 Translational Activity in the Prefrontal Cortex.* Front Neural Circuits, 2017. 11: p. 70.

47. Lipton, J.O., et al., *Aberrant Proteostasis of BMAL1 Underlies Circadian Abnormalities in a Paradigmatic mTOR-opathy.* Cell Rep, 2017. 20(4): p. 868-880.

48. Dudley, C.A., et al., *Altered patterns of sleep and behavioral adaptability in NPAS2-deficient mice.* Science, 2003. 301(5631): p. 379-83.

49. Evans, D.S., et al., *Common genetic variants in ARNTL and NPAS2 and at chromosome 12p13 are associated with objectively measured sleep traits in the elderly.* Sleep, 2013. 36(3): p. 431-46.

50. Dubowy, C. and A. Sehgal, *Circadian Rhythms and Sleep in Drosophila melanogaster.* Genetics, 2017. 205(4): p. 1373-1397.

51. Dmitrzak-Weglarz, M., et al., *Chronotype and sleep quality as a subphenotype in association studies of clock genes in mood disorders.* Acta Neurobiol Exp (Wars), 2016. 76(1): p. 32-42.

52. Duez, H. and B. Staels, *Rev-erb-alpha: an integrator of circadian rhythms and metabolism.* J Appl Physiol (1985), 2009. 107(6): p. 1972-80.

53. Utge, S.J., et al., *Systematic analysis of circadian genes in a population-based sample reveals association of TIMELESS with depression and sleep disturbance.* PLoS One, 2010. 5(2): p. e9259.

54. Moller-Levet, C.S., et al., *Effects of insufficient sleep on circadian rhythmicity and expression amplitude of the human blood transcriptome.* Proc Natl Acad Sci U S A, 2013. 110(12): p. E1132-41.

55. Dzaja, A., et al., *Sleep enhances nocturnal plasma ghrelin levels in healthy subjects.* Am J Physiol Endocrinol Metab, 2004. 286(6): p. E963-7.

56. Zhong, A., et al., *Roles of interleukin (IL)-6 gene polymorphisms, serum IL-6 levels, and treatment in obstructive sleep apnea: a meta-analysis.* Sleep Breath, 2016. 20(2): p. 719-31.

57. Gok, I., N. Huseyinoglu, and D. Ilhan, *Genetic polymorphisms variants in interleukin-6 and interleukin-1beta patients with obstructive sleep apnea syndrome in East Northern Turkey.* Med Glas (Zenica), 2015. 12(2): p. 216-22.

58. Kantojarvi, K., et al., *Variants in calcium voltage-gated channel subunit Alpha1 C-gene (CACNA1C) are associated with sleep latency in infants.* PLoS One, 2017. 12(8): p. e0180652.

59. Kumar, D., et al., *Cacna1c (Cav1.2) Modulates Electroencephalographic Rhythm and Rapid Eye Movement Sleep Recovery.* Sleep, 2015. 38(9): p. 1371-80.

60. Wang, G.Y., C.G. Lee, and E.J. Lee, *Genetic variability of arylalkylamine-N-acetyl-transferase (AA-NAT) gene and human sleep/wake pattern.* Chronobiol Int, 2004. 21(2): p. 229-37.

61. Hohjoh, H., et al., *Significant association of the arylalkylamine N-acetyltransferase ( AA-NAT) gene with delayed sleep phase syndrome.* Neurogenetics, 2003. 4(3): p. 151-3.

62. Brennan, K.C., et al., *Casein kinase idelta mutations in familial migraine and advanced sleep phase.* Sci Transl Med, 2013. 5(183): p. 183ra56, 1-11.

63. Xu, Y., et al., *Functional consequences of a CKIdelta mutation causing familial advanced sleep phase syndrome.* Nature, 2005. 434(7033): p. 640-4.

64. Chen, J. and H.S. Randeva, *Genomic organization and regulation of the human orexin (hypocretin) receptor 2 gene: identification of alternative promoters.* Biochem J, 2010. 427(3): p. 377-90.

65. Byrne, E.M., et al., *A genome-wide association study of caffeine-related sleep disturbance: confirmation of a role for a common variant in the adenosine receptor.* Sleep, 2012. 35(7): p. 967-75.

66. Rupp, T.L., et al., *PER3 and ADORA2A polymorphisms impact neurobehavioral performance during sleep restriction.* J Sleep Res, 2013. 22(2): p. 160-5.

67. Nova, P., et al., *Modeling caffeine concentrations with the Stanford Caffeine Questionnaire: preliminary evidence for an interaction of chronotype with the effects of caffeine on sleep.* Sleep Med, 2012. 13(4): p. 362-7.

68. Larkin, E.K., et al., *A candidate gene study of obstructive sleep apnea in European Americans and African Americans.* Am J Respir Crit Care Med, 2010. 182(7): p. 947-53.

69. Piatto, V.B., et al., *Polymorphisms in the 5-HTR2A gene related to obstructive sleep apnea syndrome.* Braz J Otorhinolaryngol, 2011. 77(3): p. 348-55.

70. Li, Q. and X. Zheng, *Tumor necrosis factor alpha is a promising circulating biomarker for the development of obstructive sleep apnea syndrome: a meta-analysis.* Oncotarget, 2017. 8(16): p. 27616-27626.

71. Sun, J., et al., *Obstructive Sleep Apnea Susceptibility Genes in Chinese Population: A Field Synopsis and Meta-Analysis of Genetic Association Studies.* PLoS One, 2015. 10(8): p. e0135942.

72. Kalra, M., et al., *Association of ApoE genetic variants with obstructive sleep apnea in children.* Sleep Med, 2008. 9(3): p. 260-5.

73. Drogos, L.L., et al., *Evidence of association between sleep quality and APOE ε4 in healthy older adults A pilot study.* Neurology, 2016. 87(17): p. 1836-1842.

74. Uyrum, E., et al., *The relationship between obstructive sleep apnea syndrome and apolipoprotein E genetic variants.* Respiration, 2015. 89(3): p. 195-200.

75. Pellegrino, R., et al., *Apolipoprotein E polymorphisms and sleep quality in obstructive sleep apnea syndrome.* Clin Chim Acta, 2011. 412(23-24): p. 2223-7.

76. Jordan, W., et al., *Prostaglandin D synthase (beta-trace) in healthy human sleep.* Sleep, 2004. 27(5): p. 867-74.

77. Pinzar, E., et al., *Prostaglandin D synthase gene is involved in the regulation of non-rapid eye movement sleep.* Proc Natl Acad Sci U S A, 2000. 97(9): p. 4903-7.

78. Qu, W.M., et al., *Lipocalin-type prostaglandin D synthase produces prostaglandin D2 involved in regulation of physiological sleep.* Proc Natl Acad Sci U S A, 2006. 103(47): p. 17949-54.

79. Oporto, G.H.t., et al., *Genetic polymorphisms in the serotonergic system are associated with circadian manifestations of bruxism.* J Oral Rehabil, 2016. 43(11): p. 805-812.

80. Bouvette-Turcot, A.A., et al., *Effects of Genotype and Sleep on Temperament.* Pediatrics, 2015. 136(4): p. e914-21.

81. Polito, L., et al., *Serotonin transporter polymorphism modifies the association between depressive symptoms and sleep onset latency complaint in elderly people: results from the 'InveCe.Ab' study.* J Sleep Res, 2015. 24(2): p. 215-22.

82. Valomon, A., et al., *Genetic polymorphisms of DAT1 and COMT differentially associate with actigraphy-derived sleep-wake cycles in young adults.* Chronobiol Int, 2014. 31(5): p. 705-14.

83. Gruber, R., et al., *Sleep and COMT polymorphism in ADHD children: preliminary actigraphic data.* J Am Acad Child Adolesc Psychiatry, 2006. 45(8): p. 982-9.

84. Goel, N., et al., *Catechol-O-methyltransferase Val158Met polymorphism associates with individual differences in sleep physiologic responses to chronic sleep loss.* PLoS One, 2011. 6(12): p. e29283.

85. Chmielewska, I., et al., *Polymorphism of the ACE gene and the risk of obstructive sleep apnoea.* Pneumonol Alergol Pol, 2013. 81(3): p. 207-13.

86. Lin, H., et al., *Association of ACE I/D polymorphism with obstructive sleep apnea susceptibility: evidence based on 2,228 subjects.* Sleep Breath, 2014. 18(3): p. 509-16.

87. Mishra, H.K., S.K. Sharma, and V. Sreenivas, *Angiotensin-converting enzyme gene polymorphism in north Indian population with obstructive sleep apnea.* Sleep Breath, 2013. 17(3): p. 1029-37.

88. Bachmann, V., et al., *The BDNF Val66Met polymorphism modulates sleep intensity: EEG frequency- and state-specificity.* Sleep, 2012. 35(3): p. 335-44.

89. Guindalini, C., et al., *Brain-derived neurotrophic factor gene polymorphism predicts interindividual variation in the sleep electroencephalogram.* J Neurosci Res, 2014. 92(8): p. 1018-23.

90. Giacobbo, B.L., et al., *Could BDNF be involved in compensatory mechanisms to maintain cognitive performance despite acute sleep deprivation? An exploratory study.* Int J Psychophysiol, 2016. 99: p. 96-102.

91. Wu, W., et al., *Single Nucleotide Polymorphisms in Adiponectin Gene Are Not Directly Associated with Increased Risk of Obstructive Sleep Apnea Syndrome in a Chinese Han Population.* ORL J Otorhinolaryngol Relat Spec, 2016. 78(6): p. 308-319.

92. Cao, J., et al., *A preliminary study on correlation between adiponectin genotype polymorphisms and obstructive sleep apnea hypopnea syndrome.* Chin Med J (Engl), 2012. 125(12): p. 2094-8.

93. Holst, S.C., et al., *Dopaminergic role in regulating neurophysiological markers of sleep homeostasis in humans.* J Neurosci, 2014. 34(2): p. 566-73.

94. Guindalini, C., et al., *Influence of genotype on dopamine transporter availability in human striatum and sleep architecture.* Psychiatry Res, 2010. 179(2): p. 238-40.

95. He, Y., et al., *The transcriptional repressor DEC2 regulates sleep length in mammals.* Science, 2009. 325(5942): p. 866-70.

96. Hirano, A., et al., *DEC2 modulates orexin expression and regulates sleep.* Proc Natl Acad Sci U S A, 2018. 115(13): p. 3434-3439.

97. Pellegrino, R., et al., *A novel BHLHE41 variant is associated with short sleep and resistance to sleep deprivation in humans.* Sleep, 2014. 37(8): p. 1327-36.

98. Shimada, M., et al., *An approach based on a genome-wide association study reveals candidate loci for narcolepsy.* Hum Genet, 2010. 128(4): p. 433-41.

99. Manzotte, T., et al., *The human leucocyte antigen DQB1*0602 allele is associated with electroencephelograph differences in individuals with obstructive sleep apnoea syndrome.* J Sleep Res, 2013. 22(2): p. 217-22.

100. Heidbreder, A., et al., *Not Only Sleepwalking But NREM Parasomnia Irrespective of the Type Is Associated with HLA DQB1*05:01.* J Clin Sleep Med, 2016. 12(4): p. 565-70.

101. Ehlen, J.C., et al., *Bmal1 function in skeletal muscle regulates sleep.* Elife, 2017. 6.

102. Diefenbach, K., et al., *Endothelin-1 gene variant Lys198Asn and plasma endothelin level in obstructive sleep apnea.* Cardiology, 2009. 112(1): p. 62-8.

103. Buck, D., et al., *Genetic polymorphisms in endothelin-receptor-subtype-a-gene as susceptibility factor for obstructive sleep apnea syndrome.* Sleep Med, 2010. 11(2): p. 213-7.

104. Limousin, N., et al., *Restless legs syndrome, rapid eye movement sleep behavior disorder, and hypersomnia in patients with two parkin mutations.* Mov Disord, 2009. 24(13): p. 1970-6.

105. Kumru, H., et al., *Rapid eye movement sleep behavior disorder in parkinsonism with parkin mutations.* Ann Neurol, 2004. 56(4): p. 599-603.

106. Lee, S.I., et al., *Association between the melanopsin gene polymorphism OPN4*Ile394Thr and sleep/wake timing in Japanese university students.* J Physiol Anthropol, 2014. 33: p. 9.

107. Roecklein, K.A., et al., *Melanopsin gene variations interact with season to predict sleep onset and chronotype.* Chronobiol Int, 2012. 29(8): p. 1036-47.

108. Duncan, M.J., et al., *Effects of aging and genotype on circadian rhythms, sleep, and clock gene expression in APPxPS1 knock-in mice, a model for Alzheimer's disease.* Exp Neurol, 2012. 236(2): p. 249-58.

109. Jyoti, A., et al., *EEG, activity, and sleep architecture in a transgenic AbetaPPswe/PSEN1A246E Alzheimer's disease mouse.* J Alzheimers Dis, 2010. 22(3): p. 873-87.

110. Andersen, M.L., et al., *Androgen receptor CAG repeat polymorphism is not associated with erectile dysfunction complaints, gonadal steroids, and sleep parameters: data from a population-based survey.* J Androl, 2011. 32(5): p. 524-9.

111. Yin, Y., et al., *Interleukin-1beta Promoter Polymorphism Enhances the Risk of Sleep Disturbance in Alzheimer's Disease.* PLoS One, 2016. 11(3): p. e0149945.

112. Young, D., et al., *Sleep problems in Rett syndrome.* Brain Dev, 2007. 29(10): p. 609-16.

113. Gupta, T., et al., *Functional conservation of MBD proteins: MeCP2 and Drosophila MBD proteins alter sleep.* Genes Brain Behav, 2016. 15(8): p. 757-774.

114. Xu, B., et al., *Gln223Arg polymorphism in the Caucasian population and Pro1019Pro polymorphism in the Chinese population are risk factors for OSAS: An updated meta-analysis of 1159 subjects.* Rev Port Pneumol (2006), 2017. 23(2): p. 62-70.

115. Dubey, A., et al., *A study on association of leptin receptor gene polymorphism with obstructive sleep apnea syndrome in overweight and obese north Indian subjects.* Indian J Physiol Pharmacol, 2014. 58(3): p. 222-8.

116. Popko, K., et al., *Frequency of distribution of leptin receptor gene polymorphism in obstructive sleep apnea patients.* J Physiol Pharmacol, 2007. 58 Suppl 5(Pt 2): p. 551-61.

117. Takano, A., et al., *A missense variation in human casein kinase I epsilon gene that induces functional alteration and shows an inverse association with circadian rhythm sleep disorders.* Neuropsychopharmacology, 2004. 29(10): p. 1901-9.

118. Gallego, M., et al., *An opposite role for tau in circadian rhythms revealed by mathematical modeling.* Proc Natl Acad Sci U S A, 2006. 103(28): p. 10618-23.

119. Veatch, O.J., et al., *Genetic variation in melatonin pathway enzymes in children with autism spectrum disorder and comorbid sleep onset delay.* J Autism Dev Disord, 2015. 45(1): p. 100-10.

120. Geoffroy, P.A., et al., *An ASMT variant associated with bipolar disorder influences sleep and circadian rhythms: a pilot study.* Genes Brain Behav, 2014. 13(3): p. 299-304.

121. Ye, X.H., et al., *Liver X Receptor Gene Expression is Enhanced in Children with Obstructive Sleep Apnea-Hyperpnoea Syndrome and Cyclooxygenase-2 (COX-2) is Correlated with Severity of Obstructive Sleep Apnea-Hypopnea Syndrome (OSAHS).* Med Sci Monit, 2017. 23: p. 3261-3268.

122. Zeng, H.H., et al., *[Cyclooxygenase-2 overexpression and vascular endothelial growth factor expression in pharyngeal tissue of patients with OSAHS correlates with angiogenesis].* Zhongguo Ying Yong Sheng Li Xue Za Zhi, 2011. 27(2): p. 210-3.

123. Brummett, B.H., et al., *Associations of a regulatory polymorphism of monoamine oxidase-A gene promoter (MAOA-uVNTR) with symptoms of depression and sleep quality.* Psychosom Med, 2007. 69(5): p. 396-401.

124. Du, L., et al., *MAO-A gene polymorphisms are associated with major depression and sleep disturbance in males.* Neuroreport, 2004. 15(13): p. 2097-101.

125. Craig, D., D.J. Hart, and A.P. Passmore, *Genetically increased risk of sleep disruption in Alzheimer's disease.* Sleep, 2006. 29(8): p. 1003-7.

126. Li, Z., et al., *Association between Single Nucleotide Polymorphisms in Gamma-Aminobutyric Acid B Receptor, Insulin Receptor Substrate-1, and Hypocretin Neuropeptide Precursor Genes and Susceptibility to Obstructive Sleep Apnea Hypopnea Syndrome in a Chinese Han Population.* Med Princ Pract, 2016. 25(6): p. 517-524.

127. Bayazit, Y.A., et al., *Insulin receptor substrate gene polymorphism is associated with obstructive sleep apnea syndrome in men.* Laryngoscope, 2006. 116(11): p. 1962-5.

128. Backlund, L., et al., *P2RX7: expression responds to sleep deprivation and associates with rapid cycling in bipolar disorder type 1.* PLoS One, 2012. 7(8): p. e43057.

129. Utge, S., et al., *A population-based association study of candidate genes for depression and sleep disturbance.* Am J Med Genet B Neuropsychiatr Genet, 2010. 153B(2): p. 468-476.

130. Dhamija, R., et al., *Sleep abnormalities in children with Dravet syndrome.* Pediatr Neurol, 2014. 50(5): p. 474-8.

131. Papale, L.A., et al., *Altered sleep regulation in a mouse model of SCN1A-derived genetic epilepsy with febrile seizures plus (GEFS+).* Epilepsia, 2013. 54(4): p. 625-34.

132. Jaaro-Peled, H., et al., *Abnormal wake/sleep pattern in a novel gain-of-function model of DISC1.* Neurosci Res, 2016. 112: p. 63-69.

133. Sawamura, N., et al., *Nuclear DISC1 regulates CRE-mediated gene transcription and sleep homeostasis in the fruit fly.* Mol Psychiatry, 2008. 13(12): p. 1138-48, 1069.

134. Chen, X.Y., et al., *[The association between polymorphism of beta(1)-adrenoceptor genes and cardiovascular complication in obstructive sleep apnea-hypopnea syndrome patients in Han population].* Zhonghua Jie He He Hu Xi Za Zhi, 2009. 32(10): p. 736-8.

135. Bengtsson Bostrom, K., et al., *Polymorphisms in alpha- and beta-Adrenergic Receptor Genes, Hypertension, and Obstructive Sleep Apnea: The Skaraborg Sleep Study.* Int J Hypertens, 2010. 2010.

136. Lee, S.S., et al., *Sleep quality in efavirenz-treated Chinese HIV patients - comparing between GT and GG genotype of CYP2B6-516 G/T polymorphisms.* Int J STD AIDS, 2014. 25(3): p. 193-200.

137. Cohen, K., et al., *Effect of rifampicin-based antitubercular therapy and the cytochrome P450 2B6 516G>T polymorphism on efavirenz concentrations in adults in South Africa.* Antivir Ther, 2009. 14(5): p. 687-95.

138. Liu, H.G., et al., *[Nicotinamide-adenine dinucleotide phosphate oxidase p22phox expression in induced sputum cells for patients with obstructive sleep apnea hypopnea syndrome].* Zhonghua Jie He He Hu Xi Za Zhi, 2010. 33(2): p. 118-22.

139. Liu, H.G., et al., *Relationship between reduced nicotinamide adenine dinucleotide phosphate oxidase subunit p22phox gene polymorphism and obstructive sleep apnea-hypopnea syndrome in the Chinese Han population.* Chin Med J (Engl), 2009. 122(12): p. 1369-74.

140. Chen, H., et al., *Polymorphisms of the 5-hydroxytryptamine 2A/2C receptor genes and 5-hydroxytryptamine transporter gene in Chinese patients with OSAHS.* Sleep Breath, 2013. 17(4): p. 1241-8.

141. Sharpley, A.L., et al., *Allelic variation in the 5-HT2C receptor (HT2RC) and the increase in slow wave sleep produced by olanzapine.* Psychopharmacology (Berl), 2001. 153(2): p. 271-2.

142. Sakai, K., et al., *Serotonin-2A and 2C receptor gene polymorphisms in Japanese patients with obstructive sleep apnea.* Intern Med, 2005. 44(9): p. 928-33.

143. Shi, S.Q., et al., *Ube3a imprinting impairs circadian robustness in Angelman syndrome models.* Curr Biol, 2015. 25(5): p. 537-45.

144. Pelc, K., et al., *Are there distinctive sleep problems in Angelman syndrome?* Sleep Med, 2008. 9(4): p. 434-41.

145. Ehlen, J.C., et al., *Maternal Ube3a Loss Disrupts Sleep Homeostasis But Leaves Circadian Rhythmicity Largely Intact.* J Neurosci, 2015. 35(40): p. 13587-98.

146. Tsai, J.H., et al., *Association between GABA(A) receptor subunit gene cluster and zolpidem-induced complex sleep behaviors in Han Chinese.* Sleep, 2013. 36(2): p. 197-202.

147. Choi, Y.J., et al., *Polymorphism rs4263535 in GABRA1 intron 4 was related to deeper sedation by intravenous midazolam.* J Int Med Res, 2015. 43(5): p. 686-98.

148. Hammerschlag, A.R., et al., *Genome-wide association analysis of insomnia complaints identifies risk genes and genetic overlap with psychiatric and metabolic traits.* Nat Genet, 2017. 49(11): p. 1584-1592.

149. Spada, J., et al., *Genetic association of objective sleep phenotypes with a functional polymorphism in the neuropeptide S receptor gene.* PLoS One, 2014. 9(6): p. e98789.

150. Gottlieb, D.J., G. T O'Connor, and J.B. Wilk, *Genome-wide association of sleep and circadian phenotypes.* BMC medical genetics, 2007. 8(1): p. S9.

151. Hagebeuk, E.E., R.A. Van den Bossche, and A.W. De Weerd, *Respiratory and sleep disorders in female children with atypical Rett syndrome caused by mutations in the CDKL5 gene.* Developmental Medicine & Child Neurology, 2013. 55(5): p. 480-484.

152. Lo Martire, V., et al., *CDKL5 deficiency entails sleep apneas in mice.* Journal of sleep research, 2017.

153. Utge, S., et al., *Shared genetic background for regulation of mood and sleep: association of GRIA3 with sleep duration in healthy Finnish women.* Sleep, 2011. 34(10): p. 1309-16.

154. Cole, L.W., et al., *Mutations in prokineticin 2 and prokineticin receptor 2 genes in human gonadotrophin-releasing hormone deficiency: molecular genetics and clinical spectrum.* J Clin Endocrinol Metab, 2008. 93(9): p. 3551-9.

155. Kishi, T., et al., *Possible association of prokineticin 2 receptor gene (PROKR2) with mood disorders in the Japanese population.* Neuromolecular Med, 2009. 11(2): p. 114-22.

156. Balasubramanian, R., et al., *Absence of central circadian pacemaker abnormalities in humans with loss of function mutation in prokineticin 2.* J Clin Endocrinol Metab, 2014. 99(3): p. E561-6.

157. Lee, S.H., et al., *Association between the 5-HT6 receptor C267T polymorphism and response to antidepressant treatment in major depressive disorder.* Psychiatry Clin Neurosci, 2005. 59(2): p. 140-5.

158. Reichert, C.F., et al., *The circadian regulation of sleep: impact of a functional ADA-polymorphism and its association to working memory improvements.* PLoS One, 2014. 9(12): p. e113734.

159. Mazzotti, D.R., et al., *Adenosine deaminase polymorphism affects sleep EEG spectral power in a large epidemiological sample.* PLoS One, 2012. 7(8): p. e44154.

160. Bachmann, V., et al., *Functional ADA polymorphism increases sleep depth and reduces vigilant attention in humans.* Cereb Cortex, 2012. 22(4): p. 962-70.

161. Wu, D., et al., *Memory consolidation and inducible nitric oxide synthase expression during different sleep stages in Parkinson disease.* Sleep Med, 2014. 15(1): p. 116-20.

162. Tseng, I.J., et al., *Expression of inducible nitric oxide synthase (iNOS) and period 1 (PER1) clock gene products in different sleep stages of patients with cognitive impairment.* J Clin Neurosci, 2010. 17(9): p. 1140-3.

163. Palchykova, S., et al., *Manipulation of adenosine kinase affects sleep regulation in mice.* J Neurosci, 2010. 30(39): p. 13157-65.

164. Gass, N., et al., *Contribution of adenosine related genes to the risk of depression with disturbed sleep.* J Affect Disord, 2010. 126(1-2): p. 134-9.

165. Scarpa, J.R., et al., *Systems Genetic Analyses Highlight a TGFbeta-FOXO3 Dependent Striatal Astrocyte Network Conserved across Species and Associated with Stress, Sleep, and Huntington's Disease.* PLoS Genet, 2016. 12(7): p. e1006137.

166. Kimoff, R.J., et al., *Increased upper airway cytokines and oxidative stress in severe obstructive sleep apnoea.* Eur Respir J, 2011. 38(1): p. 89-97.

167. Vardeny, O., et al., *beta2 adrenergic receptor polymorphisms and nocturnal blood pressure dipping status in the Wisconsin Sleep Cohort Study.* J Am Soc Hypertens, 2011. 5(2): p. 114-22.

168. Zhang, L.Q., et al., *[Polymorphisms in the beta2 and beta3 adrenergic receptor genes in obstructive sleep apnea/hypopnea syndrome].* Zhonghua Nei Ke Za Zhi, 2005. 44(5): p. 333-6.

169. Gok, I., et al., *Roles of beta2-adrenergic receptor gene polymorphisms in a Turkish population with obstructive sleep apnea syndrome or obesity.* Genet Mol Res, 2014. 13(4): p. 8511-8.

170. Bartels, N.K., et al., *Risk factors and myocardial infarction in patients with obstructive sleep apnea: impact of beta2-adrenergic receptor polymorphisms.* BMC Med, 2007. 5: p. 1.
